# Supplementary material
Source: PubMed Central journal article supplement (PMC1626619)
Supplement: plntcell_tpc.106.044230_4.pdf [file plntcell_tpc.106.044230_4.pdf]

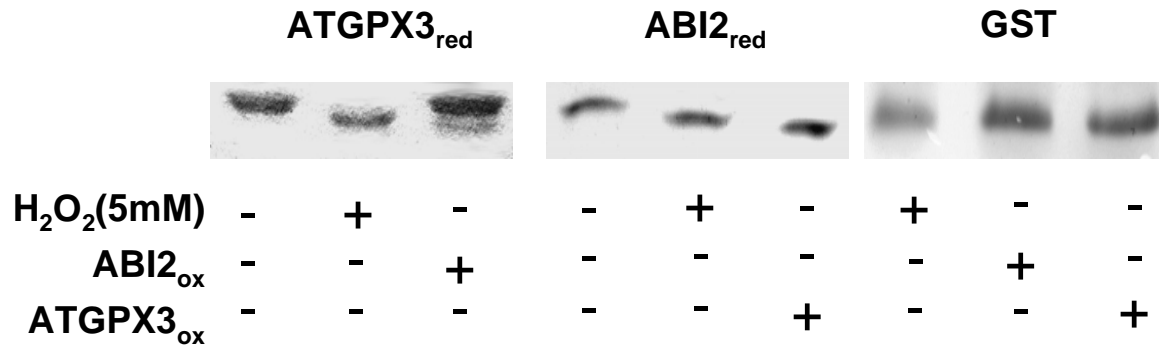

**Supplemental Figure 4.** Analysis of the ATGPX3 and ABI2 Redox State in vitro.

To make reduced proteins, extracts from *E.coli* BL21 strains carrying ATGPX3/ABI2-GST, were incubated with anti-GST bound Sepharose beads for 4 h under reducing conditions (2 mM DTT) at 4°C. The elutate containing expressed GST-ATGPX3 and GST-ABI2 was applied to analyze redox state. To make oxidative ATGPX3 and ABI2, H<sub>2</sub>O<sub>2</sub> (5 mM) was added to purified reduced GST-ATGPX3 and GST-ABI2 under anaerobiosis. The reaction was stopped by N-ethylmaleimide (10 mM) after 10 min and the ATGPX3 redox state was monitored by immunoblotting.
