# Supplementary material
Source: PubMed Central journal article supplement (PMC1626619)

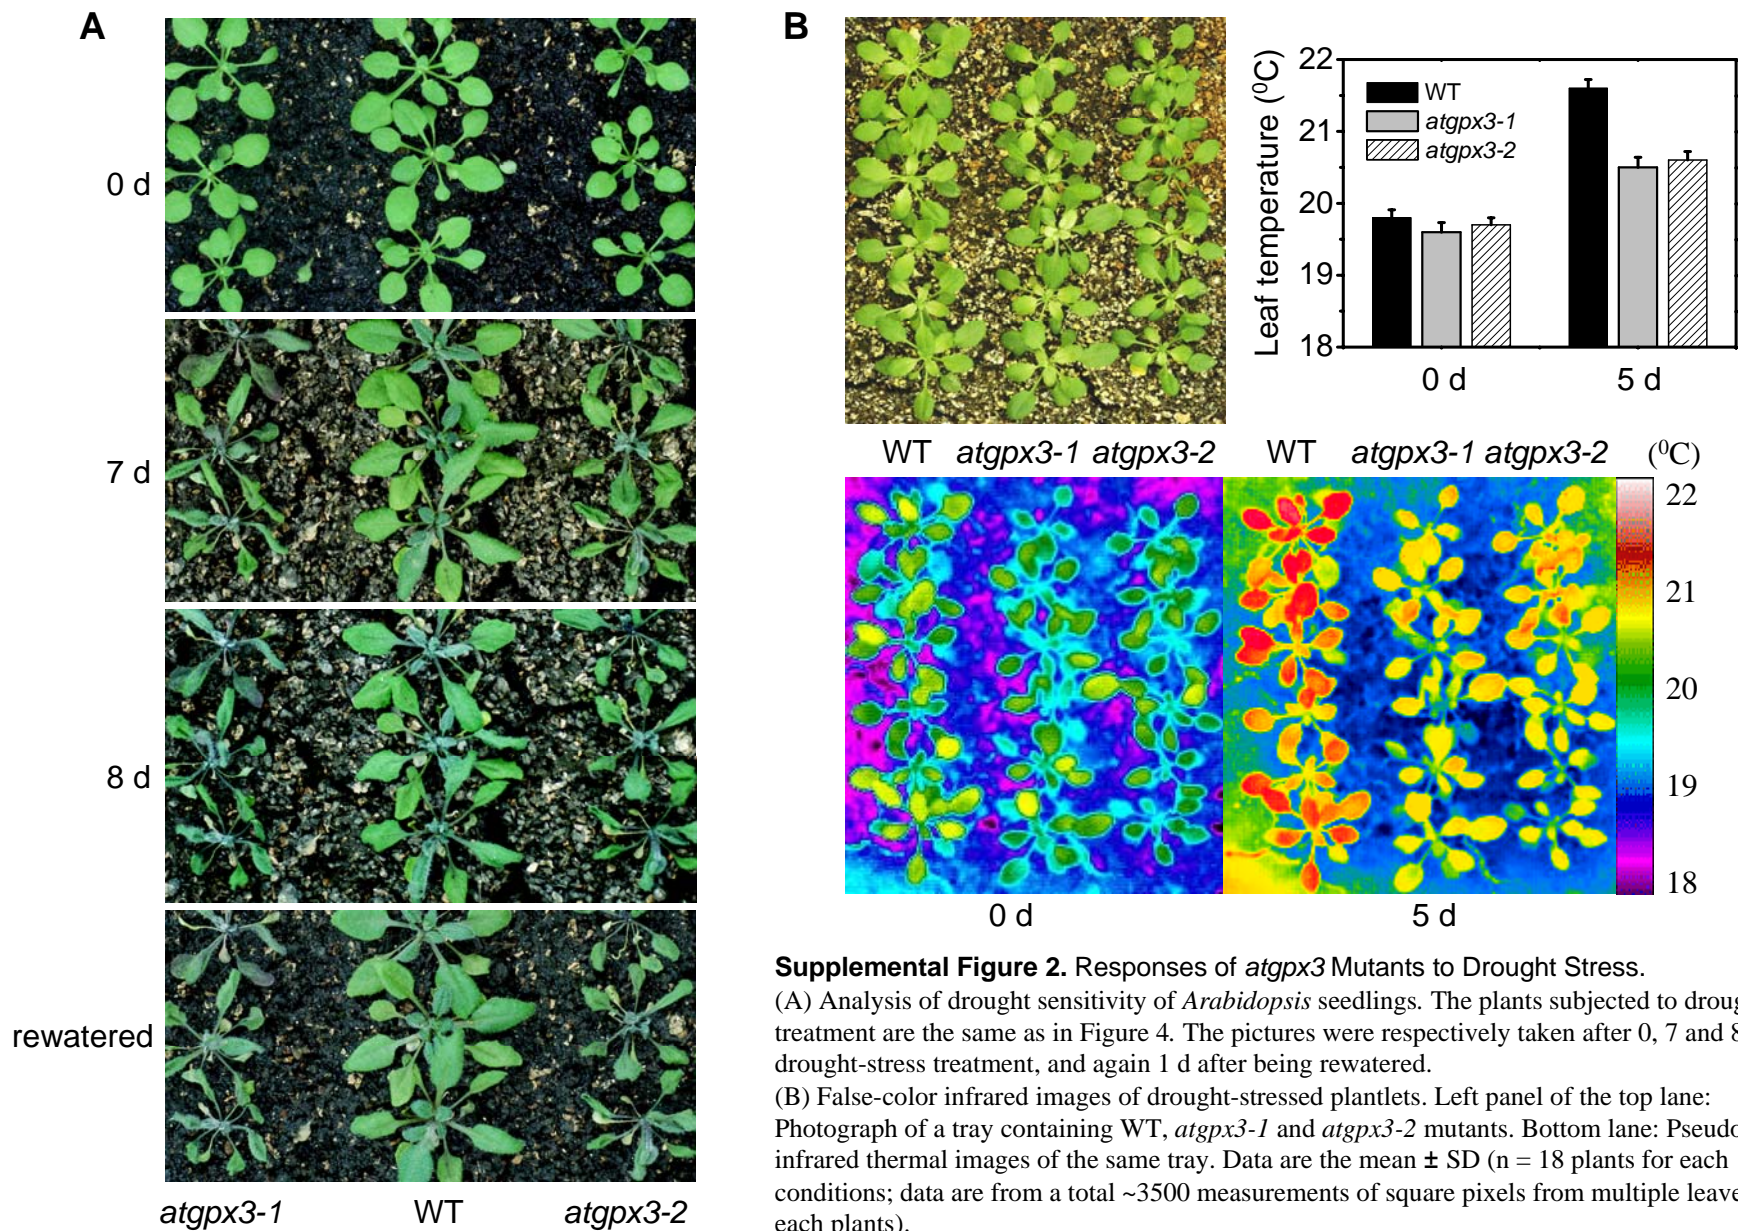

Supplement: plntcell_tpc.106.044230_2.pdf [file plntcell_tpc.106.044230_2.pdf]
